# Supplementary material
Source: MDPI journal article supplement (https://www.mdpi.com/2071-1050/14/15/9001)

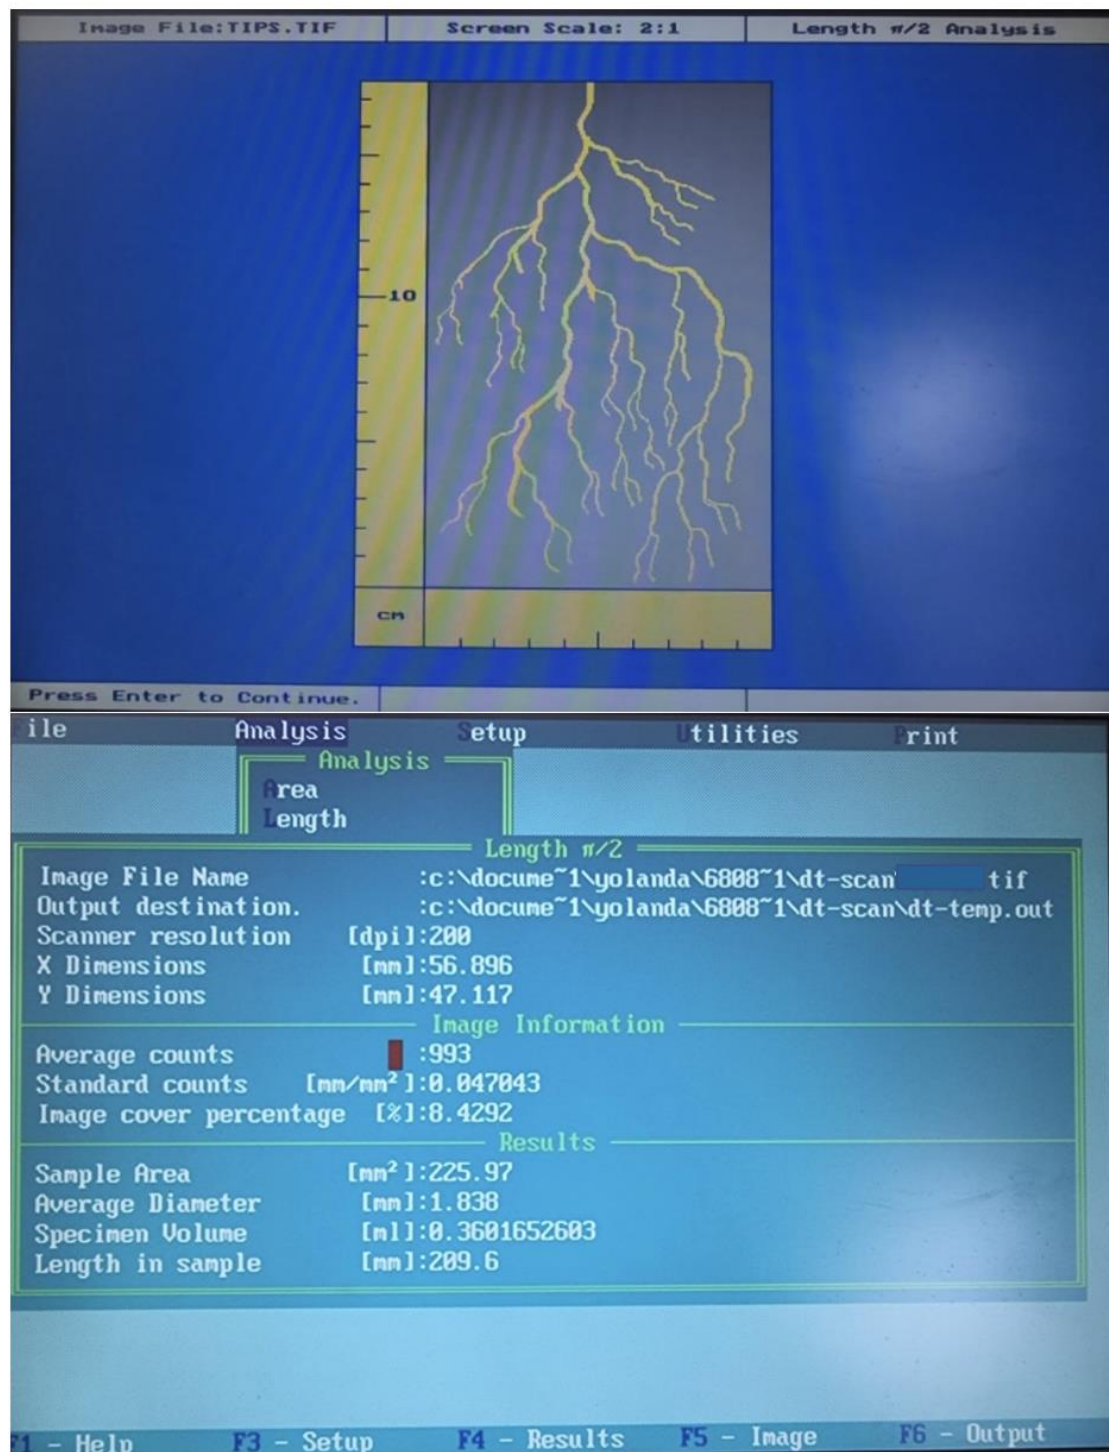

**Figure S1.** Images of the working window of the Delta-T Scan software.

Supplement: s1 [file sustainability-1758071-supplementary.pdf › sustainability-1758071-supplementary.pdf]
